# Supplementary material for: Personal, professional, and psychological impact of the COVID-19 pandemic on hospital workers: A cross-sectional survey
Source: PubMed Central journal article supplement (PMC8846533; doi:10.1371/journal.pone.0263438), 2022-02-15
Supplement: pone.0263438.s002.pdf [file pone.0263438.s002.pdf]

## Appendix 2: Survey Instruments

### A survey of the personal and professional impact of COVID-19 on health care practitioners and support staff at Sinai Health System

We invite you to participate in a questionnaire research study of the effects of the COVID-19 pandemic on health care practitioners (HCPs) and essential support staff at Sinai Health.

Hospitals across Canada are currently providing care for COVID-19 patients, or are involved in pandemic preparedness. We are faced with a rapidly changing situation and the barrage of news and social media can be overwhelming and confusing. We are all experiencing a range of emotions.

The purpose of this survey is to evaluate the work-related and non-work related concerns regarding the COVID-19 outbreak of those who work at Mount Sinai Hospital and Bridgepoint. We seek input from nurses, physicians, respiratory therapists, pharmacists, clerical staff, allied health, environmental services, and any other hospital personnel.

The aims of this study are to describe the effects of the COVID-19 pandemic (and preparations for it) on:

- o Your work in the hospital
- o Concerns about yourself and your family members
- o Anxiety, stress, and your mental health
- o Any strategies that have helped you cope

The survey will take approximately 20 minutes to complete. If you agree to participate, please click on the link below.

If you prefer to complete the survey on paper, please collect a paper copy of the survey from an envelope in your department and drop the completed survey back at the same place in an envelope with a completed survey sign.

Please complete the survey once only, either on paper or online but not both.

Participation is voluntary and submitting data implies your consent to participate. We encourage you to respond to all questions, but you can skip any questions and still continue with the survey. The information you provide will be kept anonymous and confidential.

Questions? Please email [Geeta.mehta@sinaihealth.ca](mailto:Geeta.mehta@sinaihealth.ca)

If you have any questions about your rights as a research participant or have concerns about this study, call Ronald Heslegrave, PhD, Chair of the Mount Sinai Hospital Research Ethics Board (REB) or the Research Ethics office number at 416-586-4875, during regular business hours (9:00 am to 5:00 pm). The REB is a group of people who oversee the ethical conduct of research studies. These people are not part of the study team. Everything that you discuss will be kept confidential.

Thank you.

Geeta Mehta MD, Christopher Yarnell MD, Jennie Johnstone MD PhD, Chaim Bell MD, Lianne Jeffs RN PhD FAAN, Alex Kiss PhD, and Robert Maunder MD

## The Impact of COVID-19 on Sinai Health System

### A. Personal Details

1. I work at (select one or both)     Mount Sinai Hospital                       Bridgepoint
2. My job type is (select one response only)
- |                                                                                                                                    |                                            |                                                     |                                                    |
|------------------------------------------------------------------------------------------------------------------------------------|--------------------------------------------|-----------------------------------------------------|----------------------------------------------------|
| <input type="checkbox"/> MD - Staff Physician                                                                                      | <input type="checkbox"/> MD - Fellow       | <input type="checkbox"/> MD - Resident              | <input type="checkbox"/> MD - Student              |
| <input type="checkbox"/> Nurse                                                                                                     | <input type="checkbox"/> Nurse Aide        | <input type="checkbox"/> Respiratory Therapy        | <input type="checkbox"/> Pharmacy                  |
| <input type="checkbox"/> Dietetics                                                                                                 | <input type="checkbox"/> Physiotherapy     | <input type="checkbox"/> Occupational Therapy       | <input type="checkbox"/> Speech Language Pathology |
| <input type="checkbox"/> Social Work                                                                                               | <input type="checkbox"/> Spiritual Care    | <input type="checkbox"/> Research                   | <input type="checkbox"/> Manager                   |
| <input type="checkbox"/> Engineering                                                                                               | <input type="checkbox"/> Housekeeping      | <input type="checkbox"/> Food Services              | <input type="checkbox"/> Clerical                  |
| <input type="checkbox"/> Laboratory Services                                                                                       | <input type="checkbox"/> Security          | <input type="checkbox"/> Porter                     | <input type="checkbox"/> Volunteer                 |
| <input type="checkbox"/> Radiology technologist                                                                                    | <input type="checkbox"/> Echo technologist | <input type="checkbox"/> IT/ Information technology |                                                    |
| <input type="checkbox"/> Student (e.g. Nursing, Respiratory Therapy, Pharmacy, Physiotherapy) <input type="checkbox"/> Other _____ |                                            |                                                     |                                                    |
3. What is your clinical area?
- |                                                                |                                                  |                                              |
|----------------------------------------------------------------|--------------------------------------------------|----------------------------------------------|
| <input type="checkbox"/> Cardiology                            | <input type="checkbox"/> Emergency Department    | <input type="checkbox"/> ENT Surgery         |
| <input type="checkbox"/> General Internal Medicine             | <input type="checkbox"/> General Surgery         | <input type="checkbox"/> Intensive care unit |
| <input type="checkbox"/> Neonatal ICU                          | <input type="checkbox"/> Obstetrics / Gynecology | <input type="checkbox"/> Orthopedic Surgery  |
| <input type="checkbox"/> Psychiatry                            | <input type="checkbox"/> Radiology               | <input type="checkbox"/> Other _____         |
| <input type="checkbox"/> N/A – I don't work in a clinical area |                                                  |                                              |
4. My age is     < 30 yrs     31-40     41-50     51-60     61-70     > 70 yrs
5. The length of my experience as a hospital/health care worker is:
- ≤ 5 years     6-10 years     11-20 years     > 20 years
6. My gender is     Male     Female     Non-binary     Prefer not to answer
7. (if yes to 'Female') Are you pregnant or do you think you might be pregnant?     Yes     No
8. Do you take medication or have a medical condition that places you at higher risk of poor outcomes if you were infected with COVID-19?     Yes     No
9. My ethnic group is
- Indigenous (First Nations, Inuit, Metis, person from any country)
- Black
- East Asian (Chinese, Japanese, Korean etc.)
- South Asian (Indian, Pakistani, Sri Lankan, East Indian from Guyana, etc.)
- Southeast Asian (Filipino, Cambodian, Indonesian, Laotian, etc.)
- West Asian (Iranian, Iraqi, Persian, etc)
- Central Asian (Kazakh, Afghan, Tajik, etc.)
- Middle Eastern
- White
- Other (specify): \_\_\_\_\_
- I prefer not to answer
10. My marital status is  Single     Married/common-law     Divorced/Separated     Widowed     I prefer not to answer
11. Do you have children?  Yes     No
- (if 'yes') The number of children I have is \_\_\_\_\_. What are their ages? #1\_\_\_\_\_ #2\_\_\_\_\_ #3\_\_\_\_\_ #4\_\_\_\_\_ #5\_\_\_\_\_
- The number of children living with me is \_\_\_\_\_. What are their ages? #1\_\_\_\_\_ #2\_\_\_\_\_ #3\_\_\_\_\_ #4\_\_\_\_\_ #5\_\_\_\_\_
- I am a single parent  Yes     No

12. I am presently living with (check all that apply)

- my partner
- my child/children
- extended family (e.g., parents, siblings, grandchildren)
- someone > 65 years
- someone who is immunocompromised
- roommate(s)
- caregiver / nanny
- I live alone  Other (please specify) \_\_\_\_\_

13. The nature of my work since the COVID-19 outbreak has involved direct daily contact with (check all that apply)

- Suspected or confirmed COVID-19 patients
- Non-COVID-19 patients
- Members of the public (e.g., hospital visitors)
- None of the above

14. I think I have been exposed to COVID-19 in the hospital

- Daily
- Few times per week
- Rarely
- Not at all
- Don't know

15. I personally know people who are COVID-19 positive who are my (check all that apply)

- Immediate family members
- Close friends
- Community members
- Colleagues
- Acquaintances
- I personally don't know any COVID-19 patients

16. Check ALL of the following that apply to you.

- COVID-19 patients have been treated in my clinical area
- I have personally attended to patients in isolation for confirmed COVID-19
- I have personally attended to patients in isolation for suspected COVID-19
- I have been in quarantine because of possible exposure to COVID-19
- I have been in quarantine because of a travel history
- I have personally had close contact with COVID-19 patients outside of my work
- Someone living in my home has confirmed COVID-19
- I have been asked to stay at home due to "non-essential" status
- I have been separated from my family because of COVID-19
- I have worked in the screening process for staff, patients or visitors
- I have participated in the planning and preparations for COVID-19

SD D PD PA A SA NA

**B. Exposure to COVID-19, Perception of Risk and Coping**

**With regard to the risk of contracting COVID-19 myself**

- 17. At my place of work, I believe that I have been at high risk of getting COVID-19 from:
  - a. Close contact with COVID-19 patients
  - b. The air that I breathe
  - c. Close contact with colleagues exposed to COVID-19 patients
  - d. Objects and surfaces
  - e. Shortage of personal protective equipment (PPE)
  - f. Inadequate training to use PPE
- 18. I feel that my job has put me at great risk of exposure to COVID-19
- 19. I have been afraid of falling ill with COVID-19
- 20. I feel that I have had little control over whether I get infected or not
- 21. I feel that I shouldn't have been looking after COVID-19 patients
- 22. I have accepted the risk of getting COVID-19 as part of my job
- 23. I am confident my employer would look after my medical needs if I were to fall ill with COVID-19
- 24. My family believes that I have a high risk of getting COVID-19
- 25. If I were to get COVID-19 I believe that my chances of survival are poor
- 26. I believe that my chance of dying from COVID-19 over the next year is higher than dying from
  - a. a traffic accident
  - b. cancer
- 27. I feel that people close to me outside of my work have been at high risk of getting COVID-19 because of my job
- 28. I have been concerned about passing COVID-19 to
  - a. My family members
  - b. Close friends
  - c. Work colleagues
  - d. My patients
  - e. Others
- 29. People close to me have been worried about my health
- 30. People close to me have been worried that they might get infected through me
- 31. I have been preoccupied with my own symptoms and sensations, such as feeling hot or coughing
- 32. It has been hard to feel reassured that I am healthy

**I have personally coped with the COVID-19 situation by:**

- 33. Learning as much as I can about COVID-19
- 34. Avoiding reading too much about COVID-19
- 35. Avoiding social media
- 36. Taking nutritional supplements, vitamins and tonics
- 37. Adhering to protocols and recommended measures
- 38. Just accepting the inherent risk
- 39. Trying not to think too much about the risks
- 40. Keeping my mind positive and convincing myself that I won't develop COVID-19
- 41. Avoiding crowded places
- 42. Avoiding colleagues who may be exposed
- 43. Exercising regularly
- 44. Talking to friends, family and colleagues
- 45. Using alcohol, marijuana or other recreational drugs
- 46. Cleaning my environment (car, home, etc)

**I believe that the following measures are useful in protecting me from contracting COVID-19**

|                                                                      | SD                       | D                        | PD                       | PA                       | A                        | SA                       | NA                       |
|----------------------------------------------------------------------|--------------------------|--------------------------|--------------------------|--------------------------|--------------------------|--------------------------|--------------------------|
| 47. Availability of occupational health service                      | <input type="checkbox"/> | <input type="checkbox"/> | <input type="checkbox"/> | <input type="checkbox"/> | <input type="checkbox"/> | <input type="checkbox"/> | <input type="checkbox"/> |
| 48. Screening of patients and hospital visitors for symptoms         | <input type="checkbox"/> | <input type="checkbox"/> | <input type="checkbox"/> | <input type="checkbox"/> | <input type="checkbox"/> | <input type="checkbox"/> | <input type="checkbox"/> |
| 49. Limiting number of visitors to hospital                          | <input type="checkbox"/> | <input type="checkbox"/> | <input type="checkbox"/> | <input type="checkbox"/> | <input type="checkbox"/> | <input type="checkbox"/> | <input type="checkbox"/> |
| 50. Enforcing working from home for non-essential staff              | <input type="checkbox"/> | <input type="checkbox"/> | <input type="checkbox"/> | <input type="checkbox"/> | <input type="checkbox"/> | <input type="checkbox"/> | <input type="checkbox"/> |
| 51. Information provided by my hospital                              | <input type="checkbox"/> | <input type="checkbox"/> | <input type="checkbox"/> | <input type="checkbox"/> | <input type="checkbox"/> | <input type="checkbox"/> | <input type="checkbox"/> |
| 52. The personalized mask-fit testing at my hospital                 | <input type="checkbox"/> | <input type="checkbox"/> | <input type="checkbox"/> | <input type="checkbox"/> | <input type="checkbox"/> | <input type="checkbox"/> | <input type="checkbox"/> |
| 53. Use of face protection (surgical masks, N95 masks, face shields) | <input type="checkbox"/> | <input type="checkbox"/> | <input type="checkbox"/> | <input type="checkbox"/> | <input type="checkbox"/> | <input type="checkbox"/> | <input type="checkbox"/> |
| 54. Gowns                                                            | <input type="checkbox"/> | <input type="checkbox"/> | <input type="checkbox"/> | <input type="checkbox"/> | <input type="checkbox"/> | <input type="checkbox"/> | <input type="checkbox"/> |
| 55. Hair cover                                                       | <input type="checkbox"/> | <input type="checkbox"/> | <input type="checkbox"/> | <input type="checkbox"/> | <input type="checkbox"/> | <input type="checkbox"/> | <input type="checkbox"/> |
| 56. Gloves                                                           | <input type="checkbox"/> | <input type="checkbox"/> | <input type="checkbox"/> | <input type="checkbox"/> | <input type="checkbox"/> | <input type="checkbox"/> | <input type="checkbox"/> |
| 57. Alcohol hand rub                                                 | <input type="checkbox"/> | <input type="checkbox"/> | <input type="checkbox"/> | <input type="checkbox"/> | <input type="checkbox"/> | <input type="checkbox"/> | <input type="checkbox"/> |
| 58. Regular hand washing                                             | <input type="checkbox"/> | <input type="checkbox"/> | <input type="checkbox"/> | <input type="checkbox"/> | <input type="checkbox"/> | <input type="checkbox"/> | <input type="checkbox"/> |
| 59. Isolation of COVID-19 patients                                   | <input type="checkbox"/> | <input type="checkbox"/> | <input type="checkbox"/> | <input type="checkbox"/> | <input type="checkbox"/> | <input type="checkbox"/> | <input type="checkbox"/> |

**With regard to the implementation of protective measures at work**

|                                                                                                                                        |                          |                          |                          |                          |                          |                          |                          |
|----------------------------------------------------------------------------------------------------------------------------------------|--------------------------|--------------------------|--------------------------|--------------------------|--------------------------|--------------------------|--------------------------|
| 60. I feel that they are generally effective                                                                                           | <input type="checkbox"/> | <input type="checkbox"/> | <input type="checkbox"/> | <input type="checkbox"/> | <input type="checkbox"/> | <input type="checkbox"/> | <input type="checkbox"/> |
| 61. I am satisfied with the explanation of their necessity and importance                                                              | <input type="checkbox"/> | <input type="checkbox"/> | <input type="checkbox"/> | <input type="checkbox"/> | <input type="checkbox"/> | <input type="checkbox"/> | <input type="checkbox"/> |
| 62. I feel that I received adequate training in which PPE<br>(mask, faceshield, gloves, gown) to use                                   | <input type="checkbox"/> | <input type="checkbox"/> | <input type="checkbox"/> | <input type="checkbox"/> | <input type="checkbox"/> | <input type="checkbox"/> | <input type="checkbox"/> |
| 63. I feel that I received adequate training on the safe removal of PPE                                                                | <input type="checkbox"/> | <input type="checkbox"/> | <input type="checkbox"/> | <input type="checkbox"/> | <input type="checkbox"/> | <input type="checkbox"/> | <input type="checkbox"/> |
| 64. I have someone to turn to when I have a problem using equipment                                                                    | <input type="checkbox"/> | <input type="checkbox"/> | <input type="checkbox"/> | <input type="checkbox"/> | <input type="checkbox"/> | <input type="checkbox"/> | <input type="checkbox"/> |
| 65. Emotional support (e.g., counselling) is available to those who need help                                                          | <input type="checkbox"/> | <input type="checkbox"/> | <input type="checkbox"/> | <input type="checkbox"/> | <input type="checkbox"/> | <input type="checkbox"/> | <input type="checkbox"/> |
| 66. I feel that the policies and protocols instituted for us to follow are clear                                                       | <input type="checkbox"/> | <input type="checkbox"/> | <input type="checkbox"/> | <input type="checkbox"/> | <input type="checkbox"/> | <input type="checkbox"/> | <input type="checkbox"/> |
| 67. The information and instructions provided to us are changing too<br>rapidly to keep up                                             | <input type="checkbox"/> | <input type="checkbox"/> | <input type="checkbox"/> | <input type="checkbox"/> | <input type="checkbox"/> | <input type="checkbox"/> | <input type="checkbox"/> |
| 68. I feel that the policies and protocols were implemented quickly enough                                                             | <input type="checkbox"/> | <input type="checkbox"/> | <input type="checkbox"/> | <input type="checkbox"/> | <input type="checkbox"/> | <input type="checkbox"/> | <input type="checkbox"/> |
| 69. I think that most staff adhere to recommended measures consistently                                                                | <input type="checkbox"/> | <input type="checkbox"/> | <input type="checkbox"/> | <input type="checkbox"/> | <input type="checkbox"/> | <input type="checkbox"/> | <input type="checkbox"/> |
| 70. I have little difficulty in adhering to recommended measures                                                                       | <input type="checkbox"/> | <input type="checkbox"/> | <input type="checkbox"/> | <input type="checkbox"/> | <input type="checkbox"/> | <input type="checkbox"/> | <input type="checkbox"/> |
| 71. I feel that healthcare workers treating COVID-19 patients deserve<br>a higher level of personal protection than currently provided | <input type="checkbox"/> | <input type="checkbox"/> | <input type="checkbox"/> | <input type="checkbox"/> | <input type="checkbox"/> | <input type="checkbox"/> | <input type="checkbox"/> |

**C. Impact of the COVID-19 epidemic on personal life and work**

|                                                                               |                          |                          |                          |                          |                          |                          |                          |
|-------------------------------------------------------------------------------|--------------------------|--------------------------|--------------------------|--------------------------|--------------------------|--------------------------|--------------------------|
| 72. I have someone to talk to and confide in about my concerns                | <input type="checkbox"/> | <input type="checkbox"/> | <input type="checkbox"/> | <input type="checkbox"/> | <input type="checkbox"/> | <input type="checkbox"/> | <input type="checkbox"/> |
| 73. I have been afraid to tell my family about the risk I am exposed to       | <input type="checkbox"/> | <input type="checkbox"/> | <input type="checkbox"/> | <input type="checkbox"/> | <input type="checkbox"/> | <input type="checkbox"/> | <input type="checkbox"/> |
| 74. I think people have avoided me because of my job                          | <input type="checkbox"/> | <input type="checkbox"/> | <input type="checkbox"/> | <input type="checkbox"/> | <input type="checkbox"/> | <input type="checkbox"/> | <input type="checkbox"/> |
| 75. I think people have avoided my family members because of my job           | <input type="checkbox"/> | <input type="checkbox"/> | <input type="checkbox"/> | <input type="checkbox"/> | <input type="checkbox"/> | <input type="checkbox"/> | <input type="checkbox"/> |
| 76. I have avoided telling other people about the nature of my job            | <input type="checkbox"/> | <input type="checkbox"/> | <input type="checkbox"/> | <input type="checkbox"/> | <input type="checkbox"/> | <input type="checkbox"/> | <input type="checkbox"/> |
| 77. I feel appreciated by the hospital/my employer                            | <input type="checkbox"/> | <input type="checkbox"/> | <input type="checkbox"/> | <input type="checkbox"/> | <input type="checkbox"/> | <input type="checkbox"/> | <input type="checkbox"/> |
| 78. I feel appreciated by society                                             | <input type="checkbox"/> | <input type="checkbox"/> | <input type="checkbox"/> | <input type="checkbox"/> | <input type="checkbox"/> | <input type="checkbox"/> | <input type="checkbox"/> |
| 79. I think that the morale at work has been good                             | <input type="checkbox"/> | <input type="checkbox"/> | <input type="checkbox"/> | <input type="checkbox"/> | <input type="checkbox"/> | <input type="checkbox"/> | <input type="checkbox"/> |
| 80. I feel that there is adequate staff at my workplace                       | <input type="checkbox"/> | <input type="checkbox"/> | <input type="checkbox"/> | <input type="checkbox"/> | <input type="checkbox"/> | <input type="checkbox"/> | <input type="checkbox"/> |
| 81. I feel that there is more tension and conflict amongst colleagues at work | <input type="checkbox"/> | <input type="checkbox"/> | <input type="checkbox"/> | <input type="checkbox"/> | <input type="checkbox"/> | <input type="checkbox"/> | <input type="checkbox"/> |
| 82. I have felt more stressed at work                                         | <input type="checkbox"/> | <input type="checkbox"/> | <input type="checkbox"/> | <input type="checkbox"/> | <input type="checkbox"/> | <input type="checkbox"/> | <input type="checkbox"/> |
| 83. I think that I have had an increase in workload                           | <input type="checkbox"/> | <input type="checkbox"/> | <input type="checkbox"/> | <input type="checkbox"/> | <input type="checkbox"/> | <input type="checkbox"/> | <input type="checkbox"/> |
| 84. I have had to work overtime                                               | <input type="checkbox"/> | <input type="checkbox"/> | <input type="checkbox"/> | <input type="checkbox"/> | <input type="checkbox"/> | <input type="checkbox"/> | <input type="checkbox"/> |
| 85. I have had to do work that I normally don't do                            | <input type="checkbox"/> | <input type="checkbox"/> | <input type="checkbox"/> | <input type="checkbox"/> | <input type="checkbox"/> | <input type="checkbox"/> | <input type="checkbox"/> |
| 86. I have thought about leaving my job                                       | <input type="checkbox"/> | <input type="checkbox"/> | <input type="checkbox"/> | <input type="checkbox"/> | <input type="checkbox"/> | <input type="checkbox"/> | <input type="checkbox"/> |
| 87. School closures have meant that I have to stay home to provide childcare  | <input type="checkbox"/> | <input type="checkbox"/> | <input type="checkbox"/> | <input type="checkbox"/> | <input type="checkbox"/> | <input type="checkbox"/> | <input type="checkbox"/> |

**D. Which of the following strategies would help you cope or are helping you cope at this time? (select all that apply)**

- Opportunities to learn/practice personal wellness (e.g. mindfulness, meditation)
- Mindfulness Apps like “Headspace”
- Prayer
- Managers coming to the “front lines” to offer support and solicit ideas
- Expressions of appreciation and gratitude from my hospital leadership
- Knowing my voice is heard and is important
- Being part of COVID-19 planning at my hospital
- Clear and unambiguous communication about COVID-19 from my hospital
- Less communication about COVID-19 from my hospital
- A help phonenumber for emotional support
- Having protocols and procedures about COVID-19
- Frequent team debriefs
- More frequent scheduled breaks throughout the day
- Breaks from caring for COVID-19 patients, for several days
- A quiet place to sleep or rest in the hospital
- Food and beverages provided by the hospital
- Scrubs provided by the hospital so I can change my clothes before I go home
- Shower facilities in the hospital so I can shower before I go home
- Lodging for personnel who live far away from the hospital, or for those who become infected
- Transportation to /from the hospital
- Free or subsidized hospital parking
- Childcare
- Eldercare
- Service for grocery delivery, etc
- Other (please write your suggestions)\_\_\_\_\_

THANK YOU for completing this questionnaire!

Questionnaire- Impact of COVID-19 on Healthcare workers in South West Ontario

---

**Professional Information**

---

My primary hospital is... \_\_\_\_\_

---

My primary job type is...  
[please select one response]

- MD - Staff Physician
- MD - Fellow
- MD - Resident
- MD - Student
- Nurse
- Nurse Aide
- Respiratory Therapy
- Occupational Therapy
- Physiotherapy
- Pharmacy
- Dietetics
- Speech Language Pathology
- Social Work
- Spiritual Care
- Manager
- Clerical
- Research
- Porter
- Volunteer
- Environmental Assistant or Housekeeping
- Security
- Engineering
- Food Services
- Laboratory Services
- Radiology Technologist
- Echocardiography technologist
- Information Technology
- Student (please specify)
- Other (please specify)

---

Please specify what type of student  
[e.g., Nursing, Respiratory Therapy, Pharmacy,  
Physiotherapy] \_\_\_\_\_

---

Please specify your primary job type. \_\_\_\_\_

---

Do you work in a clinical area of the hospital?

- Yes
- No

---

I work in a clinical area that cares for...  
[please select all that apply]

- Adult patients
- Pediatric patients
- Neonatal patients

---

What is your usual clinical area(s)?

- Emergency Department
- General Internal Medicine
- Intensive care unit
- Cardiology
- Respiriology
- Psychiatry
- Obstetrics/ Gynecology
- General Surgery
- Orthopedic Surgery
- ENT Surgery
- Radiology
- Other
- I don't work in a clinical area

---

Please specify your primary clinical area.

---

---

The length of my experience as a hospital/ healthcare worker is...

- ≤ 5 years
- 6-10 years
- 11-20 years
- > 20 years

---

Were you deployed to another clinical area within the past 3 to 4 months [i.e., during the COVID-19 pandemic]?

- Yes
- No

---

What is your new clinical area(s)?

- Emergency Department
- General Internal Medicine
- Intensive care unit
- Cardiology
- Respiriology
- Psychiatry
- Obstetrics/ Gynecology
- General Surgery
- Orthopedic Surgery
- ENT Surgery
- Radiology
- Other
- I don't work in a clinical area

---

Please specify the particular clinical area.

---

---

10% Complete



## Demographic Information

My age is...

- ≤ 30    31-40    41-50    51-60    61-70    >70

My gender is...

- Male    Female    Non-binary    Prefer not to answer

Are you pregnant or do you think you might be pregnant?

- Yes    No

My marital status is...

- Single    Married/Common law    Divorced/Separated    Widowed    I prefer not to answer

My ethnic group[s] is/ are...  
[please select all that apply]

- Indigenous (First Nations, Inuit, Metis, person from any country)  
 Black  
 East Asian (Chinese, Japanese, Korean etc.)  
 South Asian (Indian, Pakistani, Sri Lankan, East Indian from Guyana, etc.)  
 Southeast Asian (Filipino, Cambodian, Indonesian, Laotian, etc.)  
 West Asian (Iranian, Iraqi, Persian, etc)  
 Central Asian (Kazakh, Afghan, Tajik, etc.)  
 Middle Eastern  
 White  
 Other (specify): \_\_\_\_\_  
 I prefer not to answer

Please specify your ethnic group[s]. \_\_\_\_\_

Do you take medication or have a medical condition that places you at higher risk of poor outcomes if you were infected with COVID-19?

- Yes    No

Do you have children?

- Yes    No

The number of children I have is... \_\_\_\_\_

What are their ages?

[please list the ages of your children in this box]

---

I am a single parent.

Yes  No

---

I am presently living with [please select all that apply]

- My partner/ spouse
- My child/ children
- Extended family (e.g., parents, siblings, grandchildren)
- Someone > 65 years
- Someone who is immunocompromised
- Roommate(s)
- Caregiver/Nanny
- I live alone
- Other

---

Please specify who you are presently living with.

---

---

25% Complete

**COVID-19 Exposures**

COVID has impacted my personal life because [please select all that apply]

- I have contracted COVID-19
- I have personally had close contact with COVID-19 patients outside of my work
- Someone living in my home has confirmed COVID-19
- I have been separated from my family because of COVID-19
- COVID-19 has not impacted my personal life

The nature of my work since the COVID-19 outbreak has involved direct contact with [please select all that apply]

- Suspected or confirmed COVID-19 patients
- Non-Covid-19 patients
- Members of the public (e.g., hospital visitors)
- None of the above

Please check all of the following that apply to you.

- COVID-19 patients have been treated in my clinical area
- I have personally attended to patients in isolation for confirmed COVID-19
- I have personally attended to patients in isolation for suspected COVID-19
- I have been in quarantine because of possible exposure to COVID-19
- I have been in quarantine because of a travel history
- I have personally had close contact with COVID-19 patients outside of my work
- Someone living in my home has confirmed COVID-19
- I have been asked to stay at home due to "non-essential" status
- I have been separated from my family because of COVID-19
- I have worked in the screening process for staff, patients or visitors
- I have participated in the planning and preparations for COVID-19

I think I have been exposed to COVID-19 in the hospital...

- Daily
- Few times per week
- Rarely
- Not at all
- Don't know

35% Complete







**Please indicate your level of agreement with the following statements.**

|                                                                                                                   | Strongly Disagree     | Disagree              | Not Sure But Probably Disagree | Not Sure But Probably Agree | Agree                 | Strongly Agree        | Not Applicable        |
|-------------------------------------------------------------------------------------------------------------------|-----------------------|-----------------------|--------------------------------|-----------------------------|-----------------------|-----------------------|-----------------------|
| I am concerned about the effect of the COVID-19 pandemic on patient care                                          | <input type="radio"/> | <input type="radio"/> | <input type="radio"/>          | <input type="radio"/>       | <input type="radio"/> | <input type="radio"/> | <input type="radio"/> |
| I am concerned that restrictions on hospital visitors (i.e., families) will have a negative effect on my patients | <input type="radio"/> | <input type="radio"/> | <input type="radio"/>          | <input type="radio"/>       | <input type="radio"/> | <input type="radio"/> | <input type="radio"/> |
| I am concerned that I have not been adequately trained to manage the patients I have been asked to care for       | <input type="radio"/> | <input type="radio"/> | <input type="radio"/>          | <input type="radio"/>       | <input type="radio"/> | <input type="radio"/> | <input type="radio"/> |
| I am concerned about passing COVID-19 to my family members                                                        | <input type="radio"/> | <input type="radio"/> | <input type="radio"/>          | <input type="radio"/>       | <input type="radio"/> | <input type="radio"/> | <input type="radio"/> |
| I am concerned about passing COVID-19 to my close friends                                                         | <input type="radio"/> | <input type="radio"/> | <input type="radio"/>          | <input type="radio"/>       | <input type="radio"/> | <input type="radio"/> | <input type="radio"/> |
| I am concerned about passing COVID-19 to my patients                                                              | <input type="radio"/> | <input type="radio"/> | <input type="radio"/>          | <input type="radio"/>       | <input type="radio"/> | <input type="radio"/> | <input type="radio"/> |
| I am concerned about passing COVID-19 to my work colleagues                                                       | <input type="radio"/> | <input type="radio"/> | <input type="radio"/>          | <input type="radio"/>       | <input type="radio"/> | <input type="radio"/> | <input type="radio"/> |
| I am concerned about passing COVID-19 to others                                                                   | <input type="radio"/> | <input type="radio"/> | <input type="radio"/>          | <input type="radio"/>       | <input type="radio"/> | <input type="radio"/> | <input type="radio"/> |

Please specify which other groups you are concerned of passing COVID-19 to.

\_\_\_\_\_











**Which of the following strategies would help you cope or are helping you cope at this time?  
[please select all that apply]**

- Opportunities to learn/practice personal wellness (e.g. mindfulness, meditation)
- Managers coming to the "front lines" to offer support and solicit ideas
- Expressions of appreciation and gratitude from my hospital leadership
- Knowing my voice is heard and is important
- Being part of COVID-19 pandemic planning at my hospital
- Clear and unambiguous communication about COVID-19 from my hospital
- Less communication about COVID-19 from my hospital
- A help phoneline for emotional support
- Having protocols and procedures about COVID-19
- Frequent team debriefs
- More frequent scheduled breaks throughout the day
- Breaks from caring for COVID-19 patients, for several days
- A quiet place to sleep or rest in the hospital
- Food and beverages provided by the hospital
- Scrubs provided by the hospital so I can change my clothes before I go home
- Shower facilities in the hospital so I can shower before I go home
- Lodging for personnel who live far away from the hospital, or for those who become infected
- Transportation to /from the hospital
- Free or subsidized hospital parking
- Childcare
- Eldercare
- Services such as grocery delivery, etc
- Other

---

Please write your suggestion[s].

---

55% Complete

**Below is a list of difficulties people sometimes have after stressful life events. How much were you distressed or bothered by these difficulties during the COVID-19 pandemic?**

|                                                                                                                        | Not at all            | A little bit          | Moderately            | Quite a bit           | Extremely             |
|------------------------------------------------------------------------------------------------------------------------|-----------------------|-----------------------|-----------------------|-----------------------|-----------------------|
| Any reminder brought back feelings about it                                                                            | <input type="radio"/> | <input type="radio"/> | <input type="radio"/> | <input type="radio"/> | <input type="radio"/> |
| I had trouble staying asleep                                                                                           | <input type="radio"/> | <input type="radio"/> | <input type="radio"/> | <input type="radio"/> | <input type="radio"/> |
| Other things kept making me think about it                                                                             | <input type="radio"/> | <input type="radio"/> | <input type="radio"/> | <input type="radio"/> | <input type="radio"/> |
| I felt irritable and angry                                                                                             | <input type="radio"/> | <input type="radio"/> | <input type="radio"/> | <input type="radio"/> | <input type="radio"/> |
| I avoided letting myself get upset when I thought about it or was reminded of it                                       | <input type="radio"/> | <input type="radio"/> | <input type="radio"/> | <input type="radio"/> | <input type="radio"/> |
| I thought about it when I didn't mean to                                                                               | <input type="radio"/> | <input type="radio"/> | <input type="radio"/> | <input type="radio"/> | <input type="radio"/> |
| I felt as if it hadn't happened or wasn't real                                                                         | <input type="radio"/> | <input type="radio"/> | <input type="radio"/> | <input type="radio"/> | <input type="radio"/> |
| I stayed away from reminders of it                                                                                     | <input type="radio"/> | <input type="radio"/> | <input type="radio"/> | <input type="radio"/> | <input type="radio"/> |
| Pictures about it popped into my mind                                                                                  | <input type="radio"/> | <input type="radio"/> | <input type="radio"/> | <input type="radio"/> | <input type="radio"/> |
| I was jumpy and easily startled                                                                                        | <input type="radio"/> | <input type="radio"/> | <input type="radio"/> | <input type="radio"/> | <input type="radio"/> |
| I tried not to think about it                                                                                          | <input type="radio"/> | <input type="radio"/> | <input type="radio"/> | <input type="radio"/> | <input type="radio"/> |
| I was aware that I still had a lot of feelings about it, but I didn't deal with them                                   | <input type="radio"/> | <input type="radio"/> | <input type="radio"/> | <input type="radio"/> | <input type="radio"/> |
| My feelings about it were kind of numb                                                                                 | <input type="radio"/> | <input type="radio"/> | <input type="radio"/> | <input type="radio"/> | <input type="radio"/> |
| I found myself acting or feeling like I was back at that time                                                          | <input type="radio"/> | <input type="radio"/> | <input type="radio"/> | <input type="radio"/> | <input type="radio"/> |
| I had trouble falling asleep                                                                                           | <input type="radio"/> | <input type="radio"/> | <input type="radio"/> | <input type="radio"/> | <input type="radio"/> |
| I had waves of strong feelings about it                                                                                | <input type="radio"/> | <input type="radio"/> | <input type="radio"/> | <input type="radio"/> | <input type="radio"/> |
| I tried to remove it from my memory                                                                                    | <input type="radio"/> | <input type="radio"/> | <input type="radio"/> | <input type="radio"/> | <input type="radio"/> |
| I had trouble concentrating                                                                                            | <input type="radio"/> | <input type="radio"/> | <input type="radio"/> | <input type="radio"/> | <input type="radio"/> |
| Reminders of it caused me to have physical reactions, such as sweating, trouble breathing, nausea, or a pounding heart | <input type="radio"/> | <input type="radio"/> | <input type="radio"/> | <input type="radio"/> | <input type="radio"/> |
| I had dreams about it                                                                                                  | <input type="radio"/> | <input type="radio"/> | <input type="radio"/> | <input type="radio"/> | <input type="radio"/> |
| I felt watchful and on-guard                                                                                           | <input type="radio"/> | <input type="radio"/> | <input type="radio"/> | <input type="radio"/> | <input type="radio"/> |
| I tried not to talk about it                                                                                           | <input type="radio"/> | <input type="radio"/> | <input type="radio"/> | <input type="radio"/> | <input type="radio"/> |

---

90% Complete

**Please indicate your agreement with the following statements during the COVID-19 pandemic.**

|                                                                                      | Never                 | Rarely                | Sometimes             | Frequently            | Always                |
|--------------------------------------------------------------------------------------|-----------------------|-----------------------|-----------------------|-----------------------|-----------------------|
| I feel emotionally drained from my work                                              | <input type="radio"/> | <input type="radio"/> | <input type="radio"/> | <input type="radio"/> | <input type="radio"/> |
| I feel used up at the end of the workday                                             | <input type="radio"/> | <input type="radio"/> | <input type="radio"/> | <input type="radio"/> | <input type="radio"/> |
| I feel fatigued when I get up in the morning and have to face another day on the job | <input type="radio"/> | <input type="radio"/> | <input type="radio"/> | <input type="radio"/> | <input type="radio"/> |
| Working with people all day is really a strain for me                                | <input type="radio"/> | <input type="radio"/> | <input type="radio"/> | <input type="radio"/> | <input type="radio"/> |
| I feel burned out from my work                                                       | <input type="radio"/> | <input type="radio"/> | <input type="radio"/> | <input type="radio"/> | <input type="radio"/> |
| I feel frustrated by my job                                                          | <input type="radio"/> | <input type="radio"/> | <input type="radio"/> | <input type="radio"/> | <input type="radio"/> |
| I feel I'm working too hard on my job                                                | <input type="radio"/> | <input type="radio"/> | <input type="radio"/> | <input type="radio"/> | <input type="radio"/> |
| Working with people directly puts too much stress on me                              | <input type="radio"/> | <input type="radio"/> | <input type="radio"/> | <input type="radio"/> | <input type="radio"/> |
| I feel like I'm at the end of my rope                                                | <input type="radio"/> | <input type="radio"/> | <input type="radio"/> | <input type="radio"/> | <input type="radio"/> |
|                                                                                      | Never                 | Rarely                | Sometimes             | Frequently            | Always                |
| I can easily understand how my patients/recipients feel about things                 | <input type="radio"/> | <input type="radio"/> | <input type="radio"/> | <input type="radio"/> | <input type="radio"/> |
| I deal very effectively with the problems of my patients/recipients                  | <input type="radio"/> | <input type="radio"/> | <input type="radio"/> | <input type="radio"/> | <input type="radio"/> |
| I feel I'm positively influencing other people's lives through my work               | <input type="radio"/> | <input type="radio"/> | <input type="radio"/> | <input type="radio"/> | <input type="radio"/> |
| I feel very energetic                                                                | <input type="radio"/> | <input type="radio"/> | <input type="radio"/> | <input type="radio"/> | <input type="radio"/> |
| I can easily create a relaxed atmosphere with my patients/recipients                 | <input type="radio"/> | <input type="radio"/> | <input type="radio"/> | <input type="radio"/> | <input type="radio"/> |
| I feel exhilarated after working so closely with my patients/recipients              | <input type="radio"/> | <input type="radio"/> | <input type="radio"/> | <input type="radio"/> | <input type="radio"/> |
| I have accomplished many worthwhile things in this job                               | <input type="radio"/> | <input type="radio"/> | <input type="radio"/> | <input type="radio"/> | <input type="radio"/> |
| In my work, I deal with emotional problems very calmly                               | <input type="radio"/> | <input type="radio"/> | <input type="radio"/> | <input type="radio"/> | <input type="radio"/> |
|                                                                                      | Never                 | Rarely                | Sometimes             | Frequently            | Always                |

|                                                                              |                       |                       |                       |                       |                       |
|------------------------------------------------------------------------------|-----------------------|-----------------------|-----------------------|-----------------------|-----------------------|
| I feel I treat some patients/recipients as if they were impersonal "objects" | <input type="radio"/> | <input type="radio"/> | <input type="radio"/> | <input type="radio"/> | <input type="radio"/> |
| I've become more callous toward people since I took this job                 | <input type="radio"/> | <input type="radio"/> | <input type="radio"/> | <input type="radio"/> | <input type="radio"/> |
| I worry that this job is hardening me emotionally                            | <input type="radio"/> | <input type="radio"/> | <input type="radio"/> | <input type="radio"/> | <input type="radio"/> |
| I don't really care what happens to some patients/recipients                 | <input type="radio"/> | <input type="radio"/> | <input type="radio"/> | <input type="radio"/> | <input type="radio"/> |
| I feel patients/recipients blame me for some of their problems               | <input type="radio"/> | <input type="radio"/> | <input type="radio"/> | <input type="radio"/> | <input type="radio"/> |

---

97% Complete

**Please indicate how you have been feeling during the COVID-19 pandemic?**

|                                                                     | All of the time       | Most of the time      | Some of the time      | A little of the time  | None of the time      |
|---------------------------------------------------------------------|-----------------------|-----------------------|-----------------------|-----------------------|-----------------------|
| How often did you feel tired out for no good reason?                | <input type="radio"/> | <input type="radio"/> | <input type="radio"/> | <input type="radio"/> | <input type="radio"/> |
| How often did you feel nervous?                                     | <input type="radio"/> | <input type="radio"/> | <input type="radio"/> | <input type="radio"/> | <input type="radio"/> |
| How often did you feel so nervous that nothing could calm you down? | <input type="radio"/> | <input type="radio"/> | <input type="radio"/> | <input type="radio"/> | <input type="radio"/> |
| How often did you feel hopeless?                                    | <input type="radio"/> | <input type="radio"/> | <input type="radio"/> | <input type="radio"/> | <input type="radio"/> |
| How often did you feel restless or fidgety?                         | <input type="radio"/> | <input type="radio"/> | <input type="radio"/> | <input type="radio"/> | <input type="radio"/> |
| How often did you feel so restless you could not sit still?         | <input type="radio"/> | <input type="radio"/> | <input type="radio"/> | <input type="radio"/> | <input type="radio"/> |
| How often did you feel depressed?                                   | <input type="radio"/> | <input type="radio"/> | <input type="radio"/> | <input type="radio"/> | <input type="radio"/> |
| How often did you feel that everything was an effort?               | <input type="radio"/> | <input type="radio"/> | <input type="radio"/> | <input type="radio"/> | <input type="radio"/> |
| How often did you feel so sad that nothing could cheer you up?      | <input type="radio"/> | <input type="radio"/> | <input type="radio"/> | <input type="radio"/> | <input type="radio"/> |
| How often did you feel worthless?                                   | <input type="radio"/> | <input type="radio"/> | <input type="radio"/> | <input type="radio"/> | <input type="radio"/> |

Please feel free to provide any comments regarding the impact of the COVID-19 pandemic on your personal or professional/ work life.

---

THANK YOU for completing this survey!
